# Supplementary material for: Reaction with dioxygen of a Cu(i) complex of 1-benzyl-[3-(2′-pyridyl)]pyrazole triggers ethyl acetate hydrolysis: acetato-/pyrazolato-, dihydroxo- and diacetato-bridged Cu(ii) complexes
Source: Royal Society of Chemistry journal article supplement (doi:10.1039/b512086a), 2006-01-01
Supplement: b512086a.pdf [file b512086a.pdf]

### Electronic Supplementary Information (ESI)

## Reaction with dioxygen of a Cu(I) complex of 1-benzyl-[3-(2'-pyridyl)]pyrazole triggers ethyl acetate hydrolysis: acetato-/pyrazolato-, dihydroxo- and diacetato-bridged Cu(II) complexes

Jhumpa Mukherjee and Rabindranath Mukherjee\*

Department of Chemistry, Indian Institute of Technology Kanpur, Kanpur 208 016, India.  
E-mail: [rnm@iitk.ac.in](mailto:rnm@iitk.ac.in); Fax/Tel: +91-512-2597437

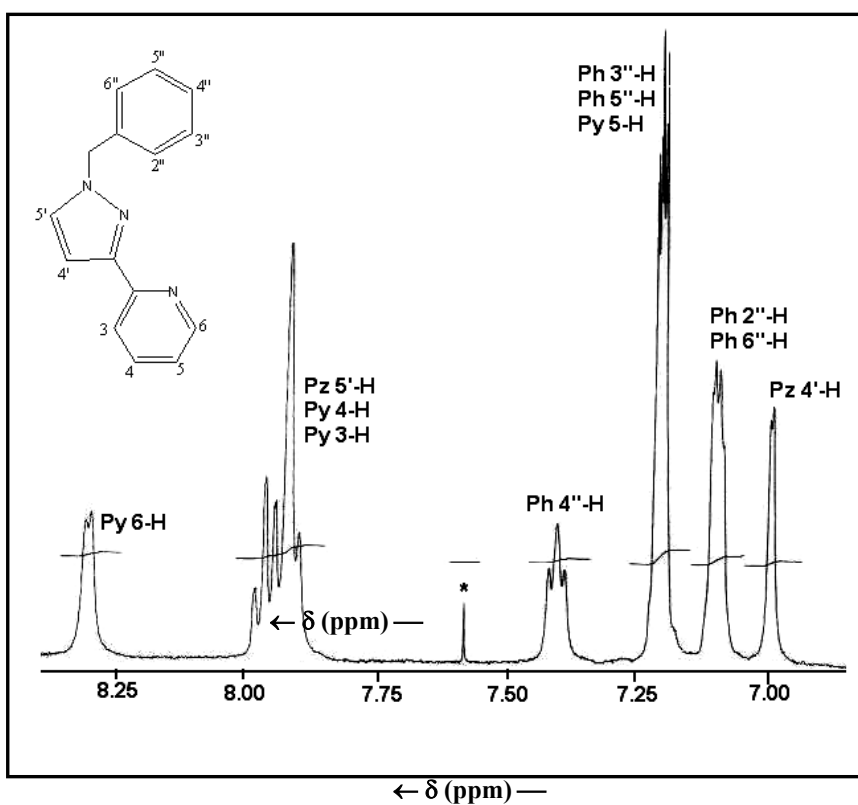

**Fig. S1** <sup>1</sup>H NMR spectrum of [(L<sup>2</sup>)Cu(MeCN)<sub>2</sub>][ClO<sub>4</sub>] (**1**) in CD<sub>3</sub>CN at 300 K.

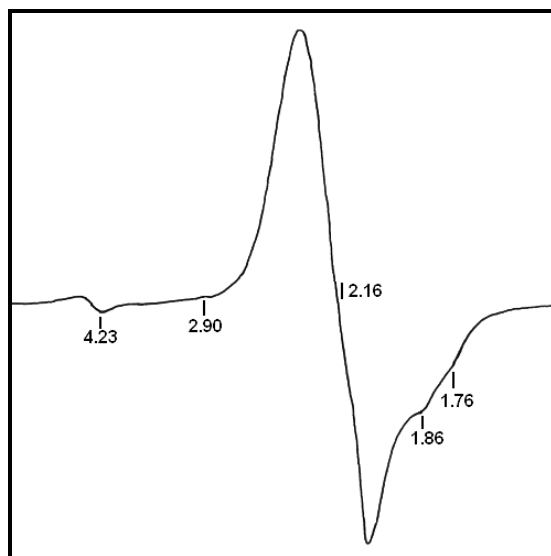

**Fig. S2** EPR spectrum of  $[\{(\mu\text{-L}^1)\text{Cu}^{\text{II}}(\mu\text{-O}_2\text{CMe})\}_n]$  (**2**) (solid) at 120 K.

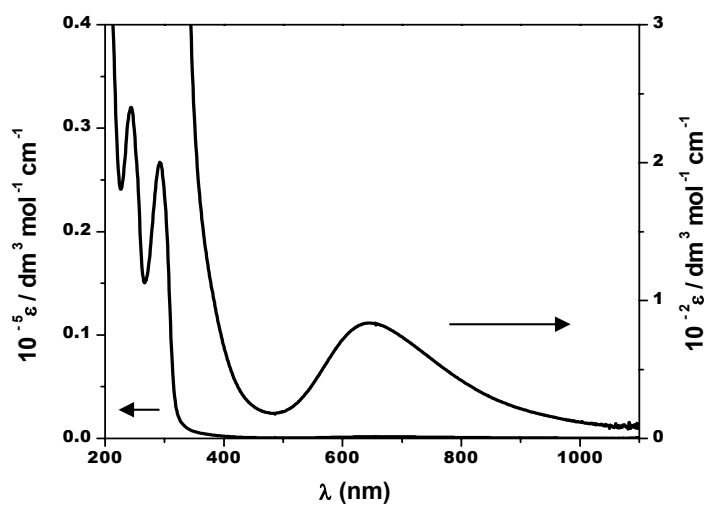

**Fig. S3** Absorption spectrum of  $[\{(L^2)\text{Cu}(\mu\text{-OH})(\text{OCIO}_3)\}_2]$  (**3**) in MeCN.

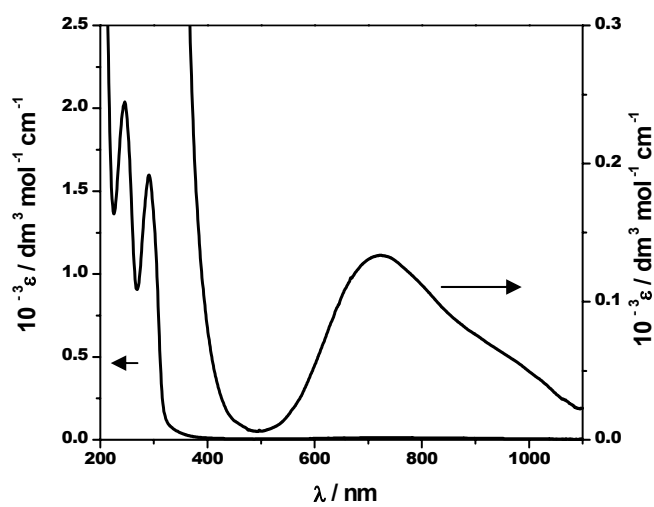

**Fig. S4** Absorption spectrum of  $[\{(L^2)Cu(dmf)(\mu-O_2CMe)\}_2][ClO_4]_2 \cdot dmf \cdot 0.5MeCO_2H$  (**4**) in MeCN.

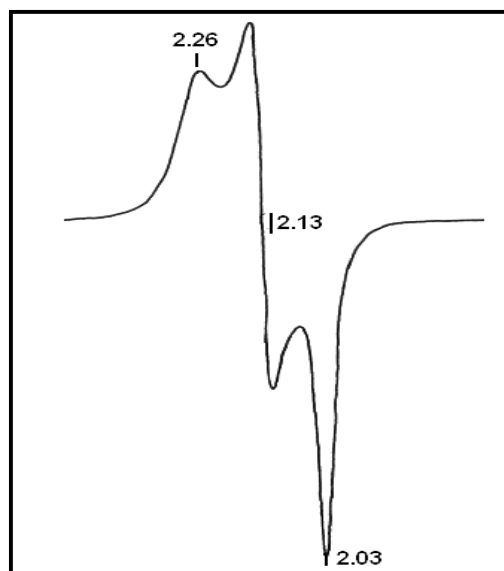

**Fig. S5** EPR spectrum of  $[\{(L^2)Cu(dmf)(\mu-O_2CMe)\}_2][ClO_4]_2 \cdot dmf \cdot 0.5MeCO_2H$  (**4**) (solid) at 300 K.
